# Supplementary material for: Asymmetric effects of Indian Ocean dipole on surface chlorophyll variability in the Indian Ocean
Source: Research Square preprint supplement (doi:10.21203/rs.3.rs-5719068/v1), 2024-12-30
Supplement: Supplementary file 1 [file 1f4eb5c6adc9637278d2d79b.docx]

Supplementary Information

for

**Asymmetric effects of Indian Ocean dipole on surface chlorophyll variability in the Indian Ocean**

Thivin Abeywickrama1, Gayan Pathirana1*, Kyung-Min Noh2, Kushlani Dissanayake1, Dongxiao Wang3, and Dong-Geon Lee4,5

1Department of Oceanography and Marine Geology, Faculty of Fisheries and Marine Sciences & Technology, University of Ruhuna, Matara, Sri Lanka.

2Princeton University/Atmospheric and Oceanic Sciences Program, Princeton, New Jersey.

3School of Marine Sciences, Sun Yat-sen University, Guangzhou, China.

4Division of Environmental Science and Engineering, Pohang University of Science and Technology (POSTECH), Pohang, South Korea.

5School of Earth and Environmental Sciences, Seoul National University, Seoul, South Korea.

*Corresponding author. Email: [upgpathirana@fish.ruh.ac.lk](mailto:upgpathirana@fish.ruh.ac.lk)


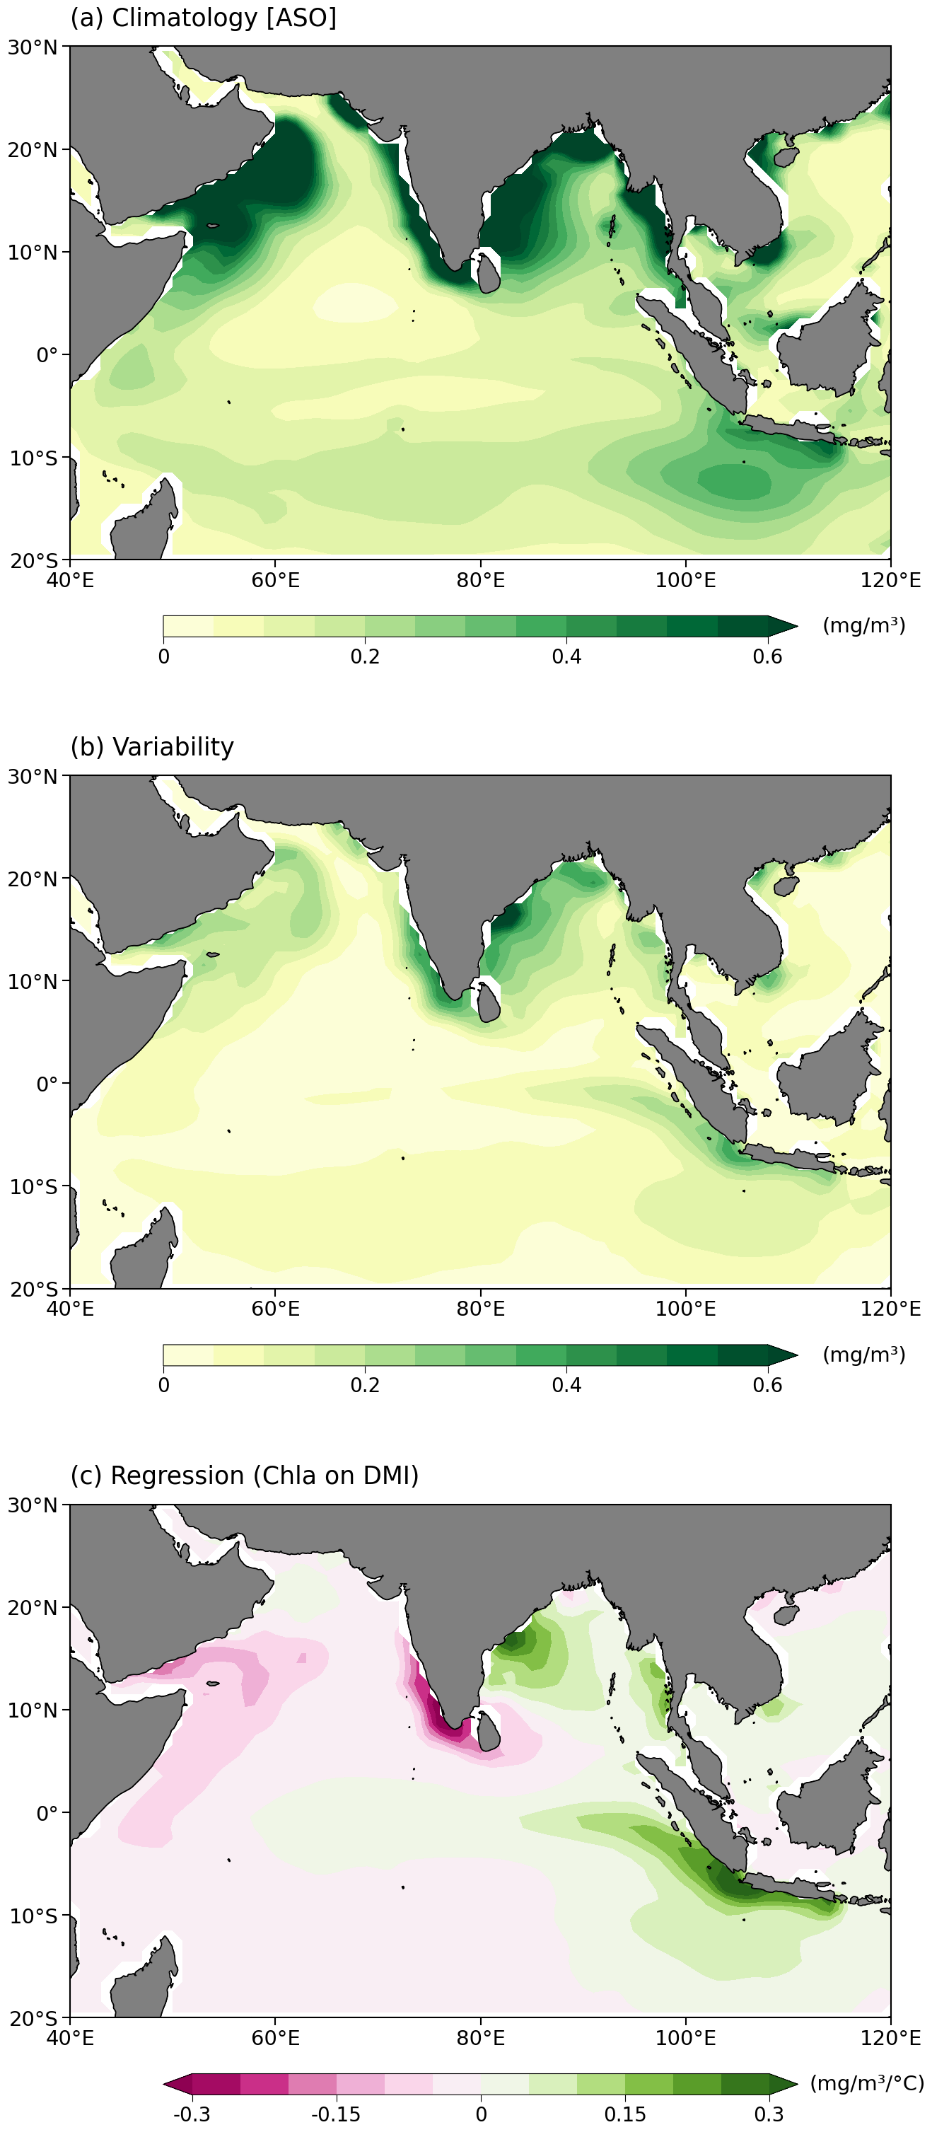


**Fig. S1** Surface chlorophyll (a) mean state, (b) interannual variability, and (c) regression on DMI for historical simulations from 1850-2014. The chosen time period is August to October.


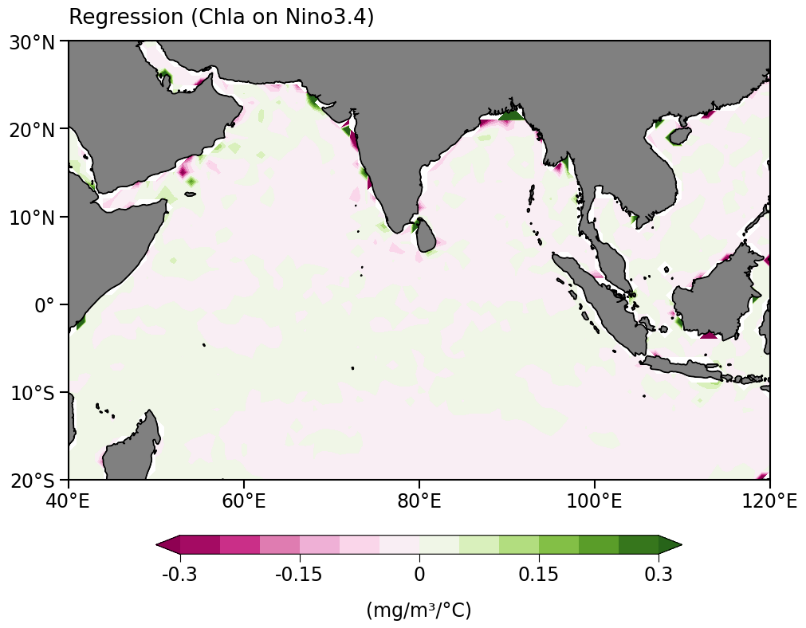


**Fig. S2** Same as **Fig. 1c** but for Niño3.4.


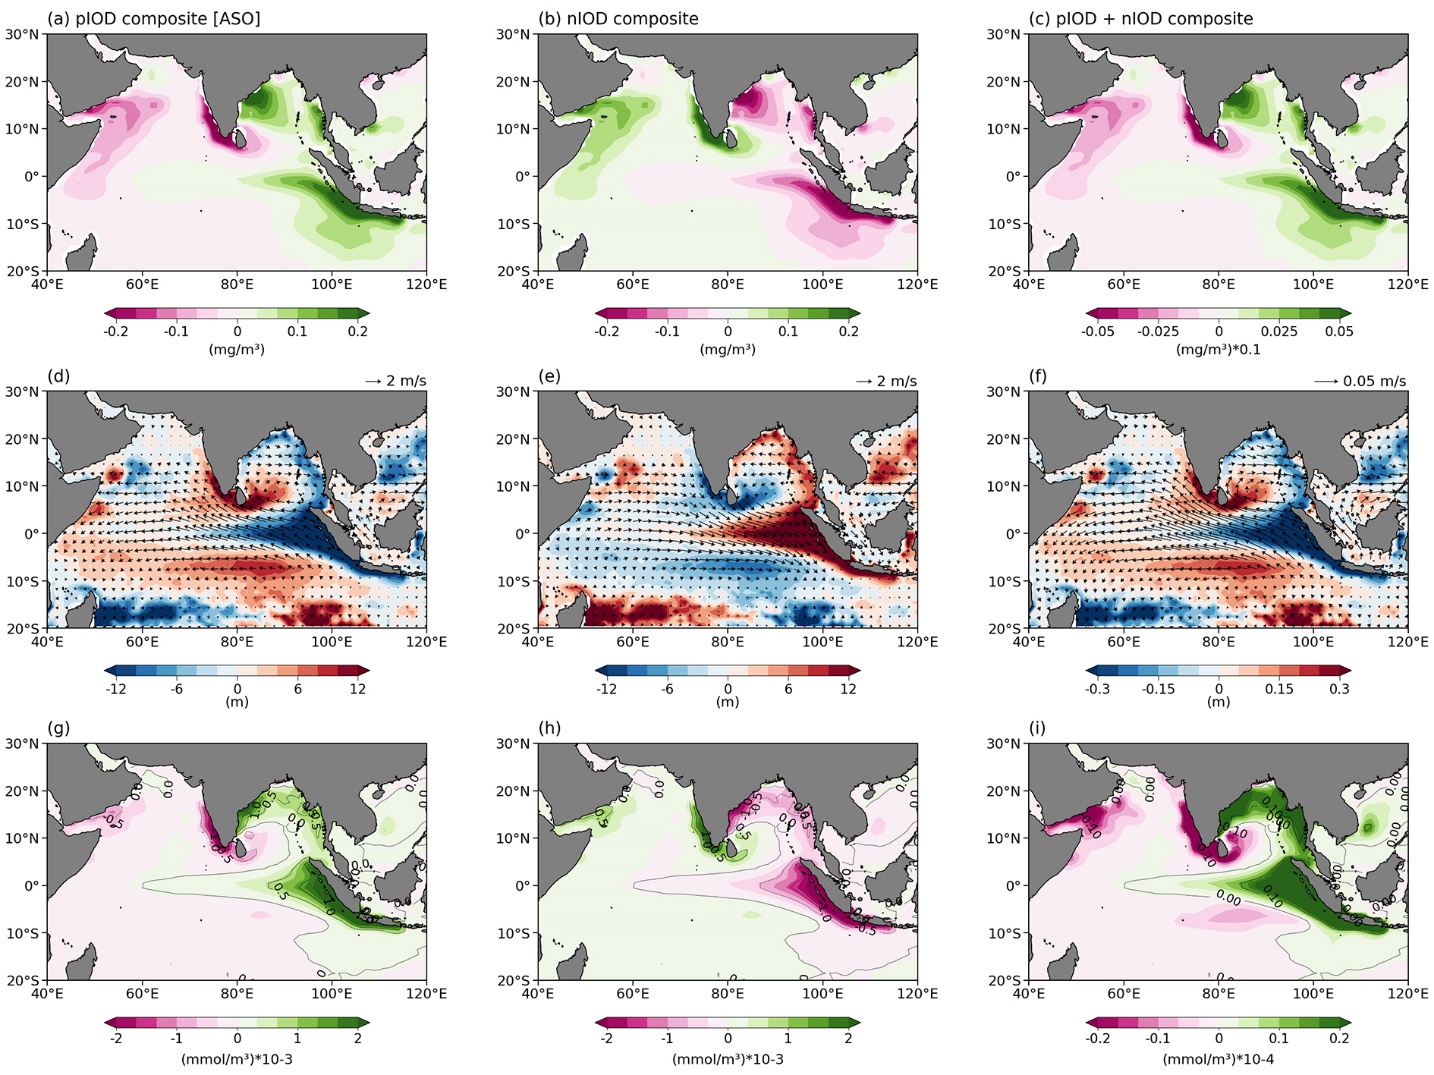


**Fig. S3** Composites of chlorophyll, thermocline and 10m winds, and nutrients nitrate and phosphate, as **Fig.** **2**, **4**, and **5** respectively, for historical simulations from 1850-2014. The chosen time period is August to October.


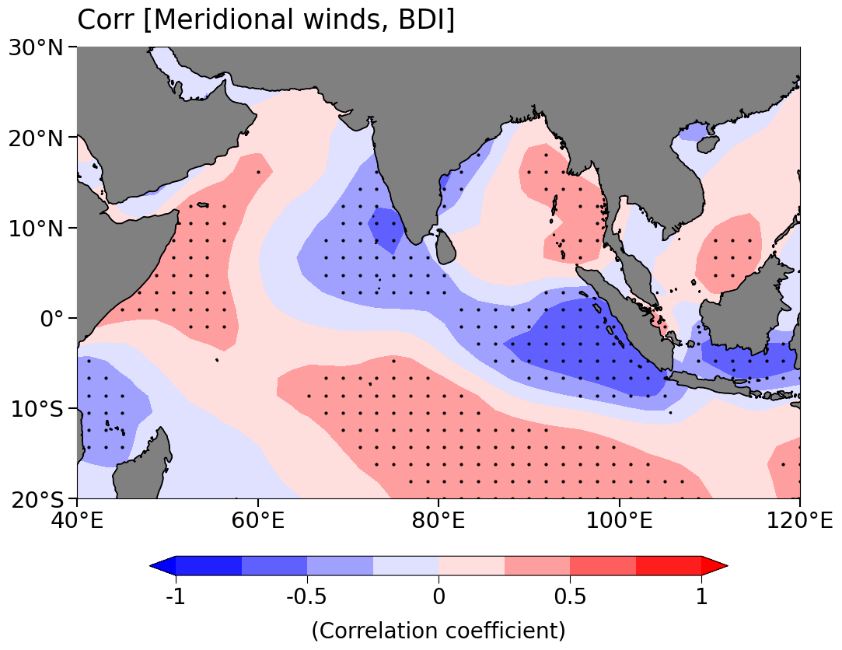


**Fig. S4** Spatial correlation plot between anomalous meridional winds and the Biological Dipole Index (BDI). Northward winds are defined as positive values. The chosen time period is August to October. The black dots indicate statistically significant regions with a 99% confidence level.

**Table S1** CMIP6 model information.

| Model | Group |
| --- | --- |
| ACCESS-ESM1-5 | Commonwealth Scientific and Industrial Research Organization, Australia |
| CanESM5 | Canadian Centre for Climate Modelling and Analysis, Canada |
| CESM2 | NSF, Department of Energy and NCAR, USA |
| CESM2-WACCM | NSF, Department of Energy and NCAR, USA |
| CNRM-ESM2-1 | Centre National de Recherches Météorologiques–Centre Européen de Recherche et de Formation Avancée en Calcul Scientifique, France |
| GFDL-ESM4 | Geophysical Fluid Dynamics Laboratory, USA |
| IPSL-CM6A-LR | Institute Pierre Simon Laplace, France |
| MIROC-ES2L | Japan Agency for Marine–Earth Science and Technology, Atmosphere and Ocean Research Institute, The University of Tokyo, National Institute for Environmental Studies, and RIKEN Center for Computational Science, Japan |
| MPI-ESM1-2-HR | Max Planck Institute for Meteorology, Germany |
| MPI-ESM1-2-LR | Max Planck Institute for Meteorology, Germany |
| NorESM2-LM | Norwegian Climate Centre, Norway |
| NorESM2-MM | Norwegian Climate Centre, Norway |
| UKESM1-0-LL | Met Office Hadley Centre/UK |
